# Supplementary material for: Preparation and Characterization of a Novel Soy Protein Isolate-Sugar Beet Pectin Emulsion Gel and Its Application as a Multi-Phased Nutrient Carrier
Source: MDPI journal article supplement (doi:10.3390/foods11030469), 2022-02-05
Supplement: s1 [file s1]

Supplementary materials

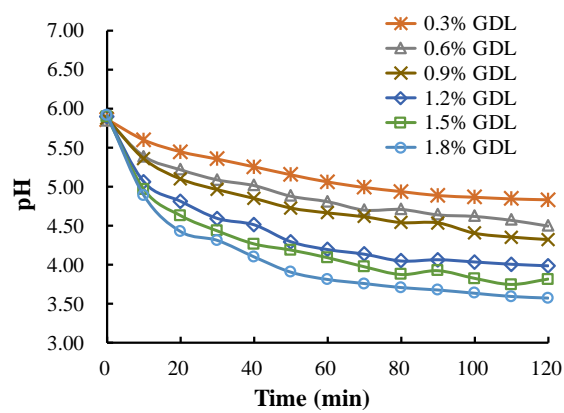

**Figure S1.** Effects of GDL concentration on pH changes of SPI-SBP emulsion.
